# Supplementary material for: MicroRNA Genes Derived from Repetitive Elements and Expanded by Segmental Duplication Events in Mammalian Genomes
Source: PLoS One. 2011 Mar 16;6(3):e17666. doi: 10.1371/journal.pone.0017666 (PMC3059204; doi:10.1371/journal.pone.0017666)
Supplement: Table S6 — List of miRNAs locate in the copy-number polymorphism and copy-number variant blocks. (XLS) [file pone.0017666.s008.xls]

## Sheet: Human
miRNA					Covered by CNP	Percentage of CNP	CNP
Chromosome	Start	End	Pre-miRNA	Strand			Chromosome	Start	End	CNP ID	Strand
chr1	3477259	3477354	hsa-mir-551a	-	96	1	chr1	3288939	3548853	cnp5	+
chr1	32224261	32224336	hsa-mir-4254	-	76	1	chr1	31682381	32466331	cnp20	+
chr1	162312336	162312430	hsa-mir-556	+	95	1	chr1	162064469	162503356	cnp63	+
chr2	56210102	56210211	hsa-mir-217	-	110	1	chr2	56178440	56472394	cnp141	+
chr2	56216085	56216194	hsa-mir-216a	-	110	1	chr2	56178440	56472394	cnp141	+
chr2	56227849	56227930	hsa-mir-216b	-	82	1	chr2	56178440	56472394	cnp141	+
chr2	133014539	133014653	hsa-mir-663b	-	115	1	chr2	130346839	133198003	cnp182	+
chr2	232578024	232578108	hsa-mir-1244-1	+	85	1	chr2	232536826	233005858	cnp207	+
chr2	232756952	232757008	hsa-mir-1471	-	57	1	chr2	232536826	233005858	cnp207	+
chr2	241395418	241395506	hsa-mir-149	+	89	1	chr2	241365122	241588871	cnp209	+
chr3	38010895	38010971	hsa-mir-26a-1	+	77	1	chr3	37831484	38104224	cnp230	+
chr3	75679914	75680009	hsa-mir-1324	+	96	1	chr3	75346160	76852374	cnp247	+
chr3	75787431	75787514	hsa-mir-4273	+	84	1	chr3	75346160	76852374	cnp247	+
chr3	128081008	128081101	hsa-mir-1280	+	94	1	chr3	128057694	128437817	cnp266	+
chr3	186504461	186504566	hsa-mir-1248	+	106	1	chr3	186337135	186567326	cnp296	+
chr3	197401367	197401447	hsa-mir-922	-	81	1	chr3	196855054	197497868	cnp304	+
chr4	28821204	28821290	hsa-mir-4275	+	87	1	chr4	28543959	28839437	cnp329	+
chr5	95414842	95414916	hsa-mir-583	+	75	1	chr5	95231707	95540433	cnp444	+
chr6	31924616	31924717	hsa-mir-1236	-	102	1	chr6	31871513	32209113	cnp504	+
chr7	101936369	101936453	hsa-mir-4285	+	85	1	chr7	101900741	102072447	cnp637	+
chr7	157367028	157367114	hsa-mir-153-2	-	87	1	chr7	157350356	157613478	cnp669	+
chr8	14710947	14711019	hsa-mir-383	-	73	1	chr8	14626201	15764706	cnp687	+
chr8	22102475	22102556	hsa-mir-320a	-	82	1	chr8	20533045	23111609	cnp693	+
chr8	100548864	100548958	hsa-mir-599	-	95	1	chr8	100404152	100838624	cnp722	+
chr8	100549014	100549089	hsa-mir-875	-	76	1	chr8	100404152	100838624	cnp722	+
chr8	145619364	145619445	hsa-mir-939	-	82	1	chr8	145523694	145697678	cnp741	+
chr9	21512114	21512184	hsa-mir-31	-	71	1	chr9	21499625	21526526	cnp769	+
chr9	86584663	86584772	hsa-mir-7-1	-	110	1	chr9	86414025	86603602	cnp790	+
chr9	139565054	139565138	hsa-mir-126	+	85	1	chr9	139250830	139826485	cnp810	+
chr9	139725409	139725475	hsa-mir-4292	+	67	1	chr9	139250830	139826485	cnp810	+
chr10	135061015	135061124	hsa-mir-202	-	110	1	chr10	134844423	135432685	cnp883	+
chr10	135185060	135185167	hsa-mir-3944	-	108	1	chr10	134844423	135432685	cnp883	+
chr11	568089	568198	hsa-mir-210	-	110	1	chr11	409847	1357392	cnp884	+
chr11	81601783	81601878	hsa-mir-4300	-	96	1	chr11	81319066	81830622	cnp933	+
chr12	9392063	9392147	hsa-mir-1244-3	-	85	1	chr12	9371596	9923529	cnp968	+
chr12	26026953	26027012	hsa-mir-4302	-	60	1	chr12	25992332	26161116	cnp976	+
chr12	54385522	54385631	hsa-mir-196a-2	+	110	1	chr12	54347070	54534646	cnp990	+
chr12	54427734	54427829	hsa-mir-615	+	96	1	chr12	54347070	54534646	cnp990	+
chr15	34674270	34674351	hsa-mir-1233-1	-	82	1	chr15	34543022	34988247	cnp1114	+
chr15	34820491	34820572	hsa-mir-1233-2	-	82	1	chr15	34543022	34988247	cnp1114	+
chr15	44085857	44085957	hsa-mir-1282	-	101	1	chr15	43823159	44148641	cnp1118	+
chr15	66332571	66332670	hsa-mir-4311	+	100	1	chr15	66180786	66350385	cnp1125	+
chr15	72879558	72879654	hsa-mir-630	+	97	1	chr15	72819786	73120560	cnp1129	+
chr15	79502130	79502213	hsa-mir-184	+	84	1	chr15	79355238	79518769	cnp1132	+
chr16	593277	593366	hsa-mir-3176	+	90	1	chr16	326993	1171068	cnp1156	+
chr16	820183	820277	hsa-mir-662	+	95	1	chr16	326993	1171068	cnp1156	+
chr16	2581923	2582006	hsa-mir-3178	-	84	1	chr16	2536823	2870536	cnp1157	+
chr16	15005077	15005170	hsa-mir-3180-1	+	94	1	chr16	14622056	15366550	cnp1169	+
chr16	15248707	15248859	hsa-mir-3180-4	-	153	1	chr16	14622056	15366550	cnp1169	+
chr16	16403736	16403823	hsa-mir-3180-2	+	88	1	chr16	16185218	16923788	cnp1170	+
chr16	18496035	18496128	hsa-mir-3180-3	-	94	1	chr16	17534101	19159306	cnp1171	+
chr16	69966984	69967083	hsa-mir-140	+	100	1	chr16	69855123	70313222	cnp1189	+
chr17	925716	925799	hsa-mir-3183	-	84	1	chr17	621587	1061405	cnp1210	+
chr17	43552729	43552801	hsa-mir-4315-1	-	73	1	chr17	43457887	43816023	cnp1228	+
chr17	46657200	46657309	hsa-mir-10a	-	110	1	chr17	46602674	46836837	cnp1231	+
chr17	46709852	46709921	hsa-mir-196a-1	-	70	1	chr17	46602674	46836837	cnp1231	+
chr17	46801770	46801837	hsa-mir-3185	-	68	1	chr17	46602674	46836837	cnp1231	+
chr17	57215119	57215233	hsa-mir-454	-	115	1	chr17	57082580	57425634	cnp1236	+
chr17	57228497	57228582	hsa-mir-301a	-	86	1	chr17	57082580	57425634	cnp1236	+
chr18	14830165	14830241	hsa-mir-3156-2	+	77	1	chr18	13998749	15377893	cnp1252	+
chr19	20510081	20510163	hsa-mir-1270-1	-	83	1	chr19	20460227	20845947	cnp1286	+
chr19	20579240	20579322	hsa-mir-1270-2	-	83	1	chr19	20460227	20845947	cnp1286	+
chr19	40788450	40788548	hsa-mir-641	-	99	1	chr19	40612421	40839520	cnp1298	+
chr19	52195865	52195934	hsa-mir-99b	+	70	1	chr19	51991897	52604625	cnp1304	+
chr19	52196039	52196117	hsa-let-7e	+	79	1	chr19	51991897	52604625	cnp1304	+
chr19	52196507	52196592	hsa-mir-125a	+	86	1	chr19	51991897	52604625	cnp1304	+
chr20	26188822	26188914	hsa-mir-663	-	93	1	chr20	25701993	26319569	cnp1327	+
chr21	14778705	14778781	hsa-mir-3156-3	-	77	1	chr21	14432700	15339752	cnp1346	+
chr22	20073269	20073356	hsa-mir-3618	+	88	1	chr22	20026494	20309447	cnp1362	+
chr22	20073581	20073665	hsa-mir-1306	+	85	1	chr22	20026494	20309447	cnp1362	+
chr22	20236657	20236734	hsa-mir-1286	-	78	1	chr22	20026494	20309447	cnp1362	+
chr22	38240279	38240378	hsa-mir-658	-	100	1	chr22	38003878	38265878	cnp1375	+
chrX	76139698	76139785	hsa-mir-384	-	88	1	chrX	76069744	76151750	cnp1410	+
chrX	140008337	140008384	hsa-mir-320d-2	-	48	1	chrX	139986264	140834012	cnp1432	+
chrX	146312238	146312361	hsa-mir-506	-	124	1	chrX	146123910	146788703	cnp1434	+
chrX	146312502	146312595	hsa-mir-507	-	94	1	chrX	146123910	146788703	cnp1434	+
chrX	146318431	146318545	hsa-mir-508	-	115	1	chrX	146123910	146788703	cnp1434	+
chrX	146331669	146331748	hsa-mir-514b	-	80	1	chrX	146123910	146788703	cnp1434	+
chrX	146340278	146340368	hsa-mir-509-2	-	91	1	chrX	146123910	146788703	cnp1434	+
chrX	146341170	146341244	hsa-mir-509-3	-	75	1	chrX	146123910	146788703	cnp1434	+
chrX	146342050	146342143	hsa-mir-509-1	-	94	1	chrX	146123910	146788703	cnp1434	+
chrX	146353853	146353926	hsa-mir-510	-	74	1	chrX	146123910	146788703	cnp1434	+
chrX	146360765	146360862	hsa-mir-514-1	-	98	1	chrX	146123910	146788703	cnp1434	+
chrX	146363461	146363548	hsa-mir-514-2	-	88	1	chrX	146123910	146788703	cnp1434	+
chrX	146366159	146366246	hsa-mir-514-3	-	88	1	chrX	146123910	146788703	cnp1434	+
chr1	117214371	117214449	hsa-mir-320b-1	+	79	1	chr1	117164916	117274675	cnp53	+
chr1	155164968	155165063	hsa-mir-92b	+	96	1	chr1	155094979	155314807	cnp61	+
chr4	115577915	115578010	hsa-mir-577	+	96	1	chr4	115342080	115590325	cnp365	+
chr8	145625476	145625559	hsa-mir-1234	-	84	1	chr8	145523694	145697678	cnp741	+
chr16	14995365	14995448	hsa-mir-3179-1	+	84	1	chr16	14622056	15366550	cnp1169	+
chr16	16394016	16394099	hsa-mir-3179-2	+	84	1	chr16	16185218	16923788	cnp1170	+
chr16	18505751	18505834	hsa-mir-3179-3	-	84	1	chr16	17534101	19159306	cnp1171	+
chr22	38243685	38243781	hsa-mir-659	-	97	1	chr22	38003878	38265878	cnp1375	+
chr1	10287776	10287861	hsa-mir-1273d	+	86	1	chr1	10238071	10582554	cnp10	+
chr2	28219234	28219316	hsa-mir-4263	+	83	1	chr2	28061337	28224630	cnp124	+
chr2	114340536	114340673	hsa-mir-1302-3	-	138	1	chr2	114074950	114428678	cnp175	+
chr3	50210759	50210852	hsa-mir-566	+	94	1	chr3	50198479	50371377	cnp238	+
chr3	163889259	163889344	hsa-mir-1263	-	86	1	chr3	163602450	163910060	cnp289	+
chr3	195426272	195426368	hsa-mir-570	+	97	1	chr3	195102788	196071593	cnp303	+
chr5	32394484	32394581	hsa-mir-579	-	98	1	chr5	32028933	32738644	cnp427	+
chr5	109849530	109849616	hsa-mir-548f-3	-	87	1	chr5	109641861	110152139	cnp458	+
chr6	57254930	57255010	hsa-mir-548u	+	81	1	chr6	57184542	57562604	cnp521	+
chr7	102046189	102046302	hsa-mir-548o	-	114	1	chr7	101900741	102072447	cnp637	+
chr8	17539087	17539166	hsa-mir-548v	-	80	1	chr8	17291181	17641530	cnp689	+
chr9	112273755	112273825	hsa-mir-3927	-	71	1	chr9	112185411	112374776	cnp799	+
chr10	70519075	70519171	hsa-mir-1254	+	97	1	chr10	70457720	70631312	cnp854	+
chr10	77312216	77312311	hsa-mir-606	+	96	1	chr10	77234938	77770449	cnp858	+
chr12	57912946	57913042	hsa-mir-616	-	97	1	chr12	57829734	58001868	cnp991	+
chr14	28102411	28102484	hsa-mir-3171	-	74	1	chr14	28065100	28443242	cnp1067	+
chr16	15001574	15001638	hsa-mir-3670	+	65	1	chr16	14622056	15366550	cnp1169	+
chr16	15104178	15104254	hsa-mir-1972-1	-	77	1	chr16	14622056	15366550	cnp1169	+
chr16	16400227	16400291	hsa-mir-3670	+	65	1	chr16	16185218	16923788	cnp1170	+
chr16	18499555	18499619	hsa-mir-3670	-	65	1	chr16	17534101	19159306	cnp1171	+
chr16	21517370	21517456	hsa-mir-3680	-	87	1	chr16	21305272	21949122	cnp1173	+
chr16	29610500	29610586	hsa-mir-3680	-	87	1	chr16	29273949	29702352	cnp1178	+
chr16	70064249	70064325	hsa-mir-1972-2	+	77	1	chr16	69855123	70313222	cnp1189	+
chr20	60528602	60528718	hsa-mir-1257	-	117	1	chr20	60461263	60583243	cnp1341	+
chr21	15017096	15017171	hsa-mir-3118-5	-	76	1	chr21	14432700	15339752	cnp1346	+
chr22	26951178	26951289	hsa-mir-548j	-	112	1	chr22	26898500	27029896	cnp1368	+
chr22	45596835	45596900	hsa-mir-1249	-	66	1	chr22	45574225	45937924	cnp1380	+
chrX	146271222	146271305	hsa-mir-513c	-	84	1	chrX	146123910	146788703	cnp1434	+
chrX	146280562	146280645	hsa-mir-513b	-	84	1	chrX	146123910	146788703	cnp1434	+
chrX	146294981	146295109	hsa-mir-513a-1	-	129	1	chrX	146123910	146788703	cnp1434	+
chrX	146307344	146307470	hsa-mir-513a-2	-	127	1	chrX	146123910	146788703	cnp1434	+
Characters in red colors indicate that the miRNA genes both overlapping with SD pairs and CNP blocks. Background colored in light grey are NRDmiRs locate in CNP blocks, background colored in pale green are PRDmiRs locate in CNP blocks and background colored in orange are RDmiRs locate in CNP blocks.

## Sheet: Rhesus
miRNA					Covered by CNV	Percentage of CNV	CNV
Chromosome	Start	End	Pre-miRNA	Strand			Chromosome	Start	End
chr9	37577953	37578031	mml-mir-3156-2	-	79	1	chr9	37558709	37777722
Characters in red colors indicate that the miRNA genes both overlapping with SD pairs and CNV blocks. Background colored in light grey are NRDmiRs locate in CNV blocks, background colored in pale green are PRDmiRs locate in CNV blocks and background colored in orange are RDmiRs locate in CNV blocks.

## Sheet: Mouse
miRNA					Covered by CNV	Percentage of CNV	CNV
Chromosome	Start	End	Pre-miRNA	Strand			Chromosome	Start	End
chr7	10225343	10225418	mmu-mir-297a-7	-	76	1	chr7	10224803	10243994
Characters in red colors indicate that the miRNA genes both overlapping with SD pairs and CNV blocks. Background colored in light grey are NRDmiRs locate in CNV blocks, background colored in pale green are PRDmiRs locate in CNV blocks and background colored in orange are RDmiRs locate in CNV blocks.
