# Supplementary material for: MicroRNA Genes Derived from Repetitive Elements and Expanded by Segmental Duplication Events in Mammalian Genomes
Source: PLoS One. 2011 Mar 16;6(3):e17666. doi: 10.1371/journal.pone.0017666 (PMC3059204; doi:10.1371/journal.pone.0017666)
Supplement: Table S7 — The enriched GO biology process terms for the target genes of common RrmiRs. (XLS) [file pone.0017666.s009.xls]

## Sheet: Human
	GO.ID	Term	Annotated	Significant	Expected	weight
1	GO:0048519	negative regulation of biological process	1794	1753	1692.06	4.3e-10
2	GO:0008283	cell proliferation	1063	1046	1002.6	1.2e-09
3	GO:0010941	regulation of cell death	827	813	780.01	3.6e-09
4	GO:0023034	intracellular signaling pathway	856	841	807.36	5.9e-09
5	GO:0048518	positive regulation of biological process	1967	1921	1855.23	1e-07
6	GO:0009887	organ morphogenesis	546	539	514.97	1.3e-06
7	GO:0006461	protein complex assembly	539	531	508.37	1.6e-06
8	GO:0048666	neuron development	349	345	329.17	1.1e-05
9	GO:0009891	positive regulation of biosynthetic process	664	648	626.27	1.6e-05
10	GO:0043687	post-translational protein modification	1368	1323	1290.26	1.9e-05

## Sheet: Rhesus
	GO.ID	Term	Annotated	Significant	Expected	weight
1	GO:0007417	central nervous system development	49	48	40.73	0.0011
2	GO:0030182	neuron differentiation	55	53	45.72	0.0023
3	GO:0007264	small GTPase mediated signal transduction	32	32	26.6	0.0024
4	GO:0070727	cellular macromolecule localization	55	52	45.72	0.0097
5	GO:0045595	regulation of cell differentiation	35	34	29.09	0.0115
6	GO:0008610	lipid biosynthetic process	22	22	18.29	0.0163
7	GO:0006461	protein complex assembly	40	38	33.25	0.0234
8	GO:0007276	gamete generation	55	51	45.72	0.0301
9	GO:0051301	cell division	28	27	23.27	0.0359
10	GO:0030030	cell projection organization	36	34	29.92	0.0415

## Sheet: Mouse
	GO.ID	Term	Annotated	Significant	Expected	weight
1	GO:0045449	regulation of transcription	1857	1841	1808.59	1.4e-08
2	GO:0051252	regulation of RNA metabolic process	1089	1081	1060.61	6.3e-07
3	GO:0009792	embryonic development ending in birth or...	424	423	412.95	0.00019
4	GO:0007049	cell cycle	662	657	644.74	0.00032
5	GO:0048523	negative regulation of cellular process	1048	1037	1020.68	0.00036
6	GO:0007154	cell communication	962	955	936.92	0.00048
7	GO:0008283	cell proliferation	634	628	617.47	0.00081
8	GO:0007242	intracellular signaling cascade	969	962	943.74	0.00095
9	GO:0007155	cell adhesion	584	580	568.78	0.0012
10	GO:0030001	metal ion transport	419	417	408.08	0.0013
